# Supplementary material
Source: HighWire-hosted journal article supplement (https://jmg.bmj.com/content/56/9/602)
Supplement: inline-supplementary-material-2 [file inline-supplementary-material-2.docx]

**TEDDY Study Acknowledgements**

The TEDDY Study Group (See appendix)

The TEDDY Study is funded by U01 DK63829, U01 DK63861, U01 DK63821, U01 DK63865, U01 DK63863, U01 DK63836, U01 DK63790, UC4 DK63829, UC4 DK63861, UC4 DK63821, UC4 DK63865, UC4 DK63863, UC4 DK63836, UC4 DK95300, UC4 DK100238, UC4 DK106955, UC4 DK112243, UC4 DK117483, and Contract No. HHSN267200700014C from the National Institute of Diabetes and Digestive and Kidney Diseases (NIDDK), National Institute of Allergy and Infectious Diseases (NIAID), National Institute of Child Health and Human Development (NICHD), National Institute of Environmental Health Sciences (NIEHS), Centers for Disease Control and Prevention (CDC), and JDRF. This work supported in part by the NIH/NCATS Clinical and Translational Science Awards to the University of Florida (UL1 TR000064) and the University of Colorado (UL1 TR001082).

***Appendix***

**The TEDDY Study Group**

**Colorado Clinical Center:** Marian Rewers, M.D., Ph.D., PI1,4,5,6,10,11, Kimberly Bautista12, Judith Baxter9,10,12,15, Ruth Bedoy2, Daniel Felipe-Morales, Kimberly Driscoll, Ph.D.9, Brigitte I. Frohnert, M.D.2,14, Marisa Gallant, M.D.13, Patricia Gesualdo2,6,12,14,15, Michelle Hoffman12,13,14, Rachel Karban12, Edwin Liu, M.D.13, Jill Norris, Ph.D.2,3,12, Adela Samper-Imaz, Andrea Steck, M.D.3,14, Kathleen Waugh6,7,12,15, Hali Wright12. University of Colorado, Anschutz Medical Campus, Barbara Davis Center for Childhood Diabetes.

**Finland Clinical Center:** Jorma Toppari, M.D., Ph.D., PI¥^1,4,11,14,Olli G. Simell, M.D., Ph.D., Annika Adamsson, Ph.D.^12,Suvi Ahonen*±§, Heikki Hyöty, M.D., Ph.D.*±6, Jorma Ilonen, M.D., Ph.D.¥¶3, Sanna Jokipuu^, Tiina Kallio^, Leena Karlsson^, Miia Kähönenµ¤, Mikael Knip, M.D., Ph.D.*±5, Lea Kovanen*±§, Mirva Koreasalo*±§2, Kalle Kurppa, M.D., Ph.D.*±13, Tiina Latva-ahoµ¤, Maria Lönnrot, M.D., Ph.D.*±6, Elina Mäntymäki^, Katja Multasuoµ¤, Tiina Niininen±*12, Sari Niinistö±§2, Mia Nyblom*±,Petra Rajala^, Jenna Rautanen±§, Anne Riikonen*±§, Minna Romo^, Juulia Rönkäµ¤, Satu Simell, M.D., Ph.D.¥13, Tuula Simell, Ph.D.¥12, Maija Sjöberg¥^12,14, Aino Steniusµ¤12, Maria Leppänen^, Sini Vainionpää^, Eeva Varjonen¥^12, Riitta Veijola, M.D., Ph.D.µ¤14, Suvi M. Virtanen, M.D., Ph.D.*±§2, Mari Vähä-Mäkilä^, Mari Åkerlund*±§, Katri Lindfors, Ph.D.*13 ¥University of Turku, *University of Tampere, µUniversity of Oulu, ^Turku University Hospital, Hospital District of Southwest Finland, ±Tampere University Hospital, ¤Oulu University Hospital, §National Institute for Health and Welfare, Finland, ¶University of Kuopio.

**Georgia/Florida Clinical Center:** Jin-Xiong She, Ph.D., PI1,3,4,11, Desmond Schatz, M.D.*4,5,7,8, Diane Hopkins12, Leigh Steed12,13,14,15, Jennifer Bryant, Jamie Thomas*6,12, Janey Adams*12, Katherine Silvis2, Michael Haller, M.D.*14, Melissa Gardiner, Richard McIndoe, Ph.D., Ashok Sharma, Stephen W. Anderson, M.D.^, Laura Jacobsen, M.D.*14 Center for Biotechnology and Genomic Medicine, Augusta University. *University of Florida, ^Pediatric Endocrine Associates, Atlanta.

**Germany Clinical Center:** Anette G. Ziegler, M.D., PI1,3,4,11, Andreas Beyerlein, Ph.D.2, Ezio Bonifacio Ph.D.*5, Anja Heublein, Michael Hummel, M.D.13, Sandra Hummel, Ph.D.2, Annette Knopff7, Charlotte Koch, Sibylle Koletzko, M.D.¶13, Claudia Ramminger, Roswith Roth, Ph.D.9, Marlon Scholz, Laura Schulzik2, Joanna Stock9,12,14, Katharina Warncke, M.D.14, Lorena Wendel, Christiane Winkler, Ph.D.2,12,15. Forschergruppe Diabetes e.V. and Institute of Diabetes Research, Helmholtz Zentrum München, Forschergruppe Diabetes, and Klinikum rechts der Isar, Technische Universität München. *Center for Regenerative Therapies, TU Dresden, ¶Dr. von Hauner Children’s Hospital, Department of Gastroenterology, Ludwig Maximillians University Munich.

**Sweden Clinical Center:** Åke Lernmark, Ph.D., PI1,3,4,5,6,8,10,11,15, Daniel Agardh, M.D., Ph.D.13, Carin Andrén Aronsson, Ph.D.2,12,13, Maria Ask, Jenny Bremer, Ulla-Marie Carlsson, Corrado Cilio, Ph.D., M.D.5, Emelie Ericson-Hallström, Annika Fors, Lina Fransson, Thomas Gard, Rasmus Bennet, Carina Hansson, Susanne Hyberg, Hanna Jisser, Fredrik Johansen, Berglind Jonsdottir, M.D., Silvija Jovic, Helena Elding Larsson, M.D., Ph.D. 6,14, Marielle Lindström, Markus Lundgren, M.D.14, Maria Månsson-Martinez, Maria Markan, Jessica Melin12, Zeliha Mestan, Caroline Nilsson, Karin Ottosson, Kobra Rahmati, Anita Ramelius, Falastin Salami, Sara Sibthorpe, Anette Sjöberg, Birgitta Sjöberg, Evelyn Tekum Amboh, Carina Törn, Ph.D. 3,15, Anne Wallin, Åsa Wimar14, Sofie Åberg. Lund University.

**Washington Clinical Center:** William A. Hagopian, M.D., Ph.D., PI1,3,4, 5, 6,7,11,13, 14, Michael Killian6,7,12,13, Claire Cowen Crouch12,14,15, Jennifer Skidmore2, Ashley Akramoff, Jana Banjanin, Masumeh Chavoshi, Kayleen Dunson, Rachel Hervey, Shana Levenson, Rachel Lyons, Arlene Meyer, Denise Mulenga, Davey Schmitt, Julie Schwabe. Pacific Northwest Research Institute.

**Pennsylvania Satellite Center:** Dorothy Becker, M.D., Margaret Franciscus, MaryEllen Dalmagro-Elias Smith2, Ashi Daftary, M.D., Mary Beth Klein, Chrystal Yates. Children’s Hospital of Pittsburgh of UPMC.

**Data Coordinating Center:** Jeffrey P. Krischer, Ph.D.,PI1,4,5,10,11, Sarah Austin-Gonzalez, Maryouri Avendano, Sandra Baethke, Rasheedah Brown12,15, Brant Burkhardt, Ph.D.5,6, Martha Butterworth2, Joanna Clasen, David Cuthbertson, Christopher Eberhard, Steven Fiske9, Dena Garcia, Jennifer Garmeson, Veena Gowda, Kathleen Heyman, Belinda Hsiao, Francisco Perez Laras, Hye-Seung Lee, Ph.D.1,2,13,15, Shu Liu, Xiang Liu, Ph.D.2,3,9,14, Kristian Lynch, Ph.D. 5,6,9,15, Colleen Maguire, Jamie Malloy, Cristina McCarthy12,15, Aubrie Merrell, Steven Meulemans, Hemang Parikh, Ph.D.3, Ryan Quigley, Cassandra Remedios, Chris Shaffer, Laura Smith, Ph.D.9,12, Susan Smith12,15, Noah Sulman, Ph.D., Roy Tamura, Ph.D.1,2,13, Ulla Uusitalo, Ph.D.2,15, Kendra Vehik, Ph.D.4,5,6,14,15, Ponni Vijayakandipan, Keith Wood, Jimin Yang, Ph.D., R.D.2,15. *Past staff: Michael Abbondondolo, Lori Ballard, David Hadley, Ph.D., Wendy McLeod.* University of South Florida.

**Project scientist:** Beena Akolkar, Ph.D.1,3,4,5,6,7,10,11. National Institutes of Diabetes and Digestive and Kidney Diseases.

**Other contributors:** Kasia Bourcier, Ph.D.5, National Institutes of Allergy and Infectious Diseases. Thomas Briese, Ph.D.6,15, Columbia University. Suzanne Bennett Johnson, Ph.D.9,12, Florida State University. Eric Triplett, Ph.D.6, University of Florida.

***Committees:***

1Ancillary Studies, 2Diet, 3Genetics, 4Human Subjects/Publicity/Publications, 5Immune Markers, 6Infectious Agents, 7Laboratory Implementation, 8Maternal Studies, 9Psychosocial, 10Quality Assurance, 11Steering, 12Study Coordinators, 13Celiac Disease, 14Clinical Implementation, 15Quality Assurance Subcommittee on Data Quality.
